# Supplementary material for: Preventing Poor Vocational Functioning in Psychosis Through Early Intervention
Source: Atypon-hosted journal article supplement (doi:10.1176/appi.ps.201500451), 2016-09-01
Supplement: appi.ps.201500451.ds001.pdf [file appi.ps.201500451.ds001.pdf]

**Table A; online supplement. Characteristics at inclusion of sample across early and usual detection areas**

|                                                                   | Usual detection |       | Early detection |        | Analysis |                  |      |
|-------------------------------------------------------------------|-----------------|-------|-----------------|--------|----------|------------------|------|
|                                                                   | N               | %     | N               | %      | RR       | Chi <sup>2</sup> | Sig. |
| <b>Female gender</b>                                              | 61              | 44    | 54              | 38     | .9       | .8               | .371 |
| <b>Diagnosis</b>                                                  |                 |       |                 |        |          |                  |      |
| Schizophrenia                                                     | 41              | 29    | 39              | 28     | 1.0      | .1               | .763 |
| Schizophreniform disorder                                         | 30              | 21    | 31              | 22     | 1.0      | .0               | .910 |
| Schizoaffective disorder                                          | 12              | 9     | 22              | 16     | 1.3      | 3.3              | .071 |
| Delusional disorder                                               | 9               | 6     | 6               | 4      | 1.0      | .7               | .418 |
| Affective disorder w/<br>psychotic features (mood<br>incongruent) | 21              | 15    | 19              | 13     | 1.0      | .1               | .715 |
| Brief psychosis                                                   | 6               | 4     | 13              | 9      | 1.1      | 2.7              | .100 |
| Psychosis NOS                                                     | 21              | 15    | 11              | 8      | .9       | 3.6              | .058 |
|                                                                   | Median          | Range | Median          | Range  | Z        | U                | Sig. |
| <b>DUP</b>                                                        | 16              | 0-966 | 5               | 0-1196 | -3.0     | 7854             | .001 |
|                                                                   | Mean            | SD    | Mean            | SD     | t        | df               | p    |
| <b>Education, length in years</b>                                 | 12              | 2.8   | 12.1            | 2.9    | -.3      | 246.4            | .758 |
| <b>PANSS component* scores</b>                                    |                 |       |                 |        |          |                  |      |
| Positive                                                          | 16.3            | 4.1   | 14.4            | 4.2    | 4.0      | 278.0            | .001 |
| Negative                                                          | 22.2            | 9.7   | 18.6            | 6.7    | 3.6      | 248.6            | .001 |
| Cognitive                                                         | 7.9             | 3.3   | 6.7             | 3.2    | 3.1      | 275.0            | .001 |
| Depressive                                                        | 13.4            | 4.1   | 11.0            | 3.7    | 5.1      | 276.0            | .001 |
| Excitative                                                        | 10.8            | 4.8   | 8.6             | 3.7    | 4.2      | 257.7            | .001 |

**\*Positive component:** p1 delusions, p3 hallucinatory behavior, p5 grandiosity, p6 suspiciousness/persecution, a9 unusual thought content, a12 lack of judgment and insight

**Negative Component:** n1 blunted affect, n2 emotional withdrawal, n3 poor rapport, n4 passive/apathetic social withdrawal, n6 lack of spontaneity and flow of conversation, a7 motor retardation, a13 disturbance of volition, a16 active social withdrawal

**Cognitive Component:** p2 conceptual disorganization, n5 difficulty in abstract thinking, n7 stereotyped thinking, a5 mannerisms and posture, a10 disorientation, a11 poor attention, a15 preoccupation

**Depressive Component:** a1 somatic concern, a2 anxiety, a3 guilt feelings, a4 tension, a6 depression  
**Excitative Component:** p4 excitement, p7 hostility, a8 uncooperativeness, a14 poor impulse control

\*\* : Bonferroni corrected  $\alpha=.01$

**Figure A; online supplement. Negative symptoms over time in usual and early detection areas**

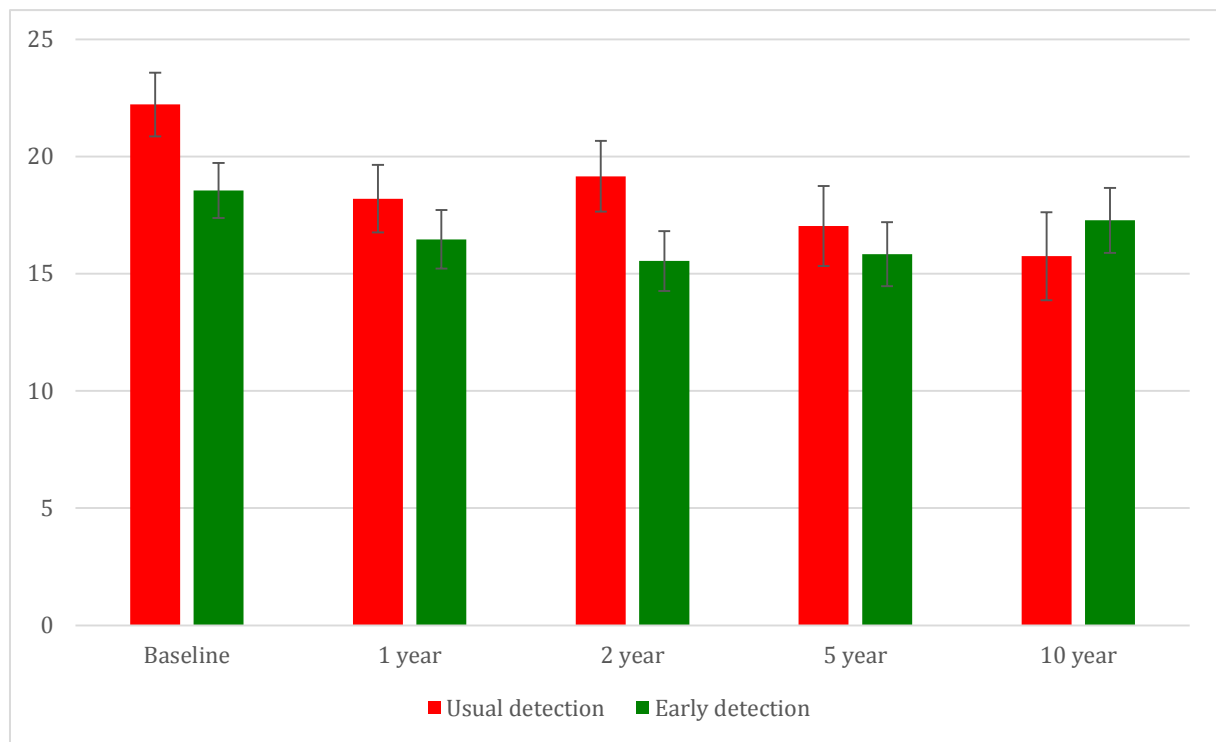

*y-axis: PANSS negative symptom component mean scores.*

*Bars represent groups of cases; usual and early detection, with 95% confidence intervals.*

**Figure B; online supplement. Full time work and/or studies over time in usual and early detection areas; percentages.**

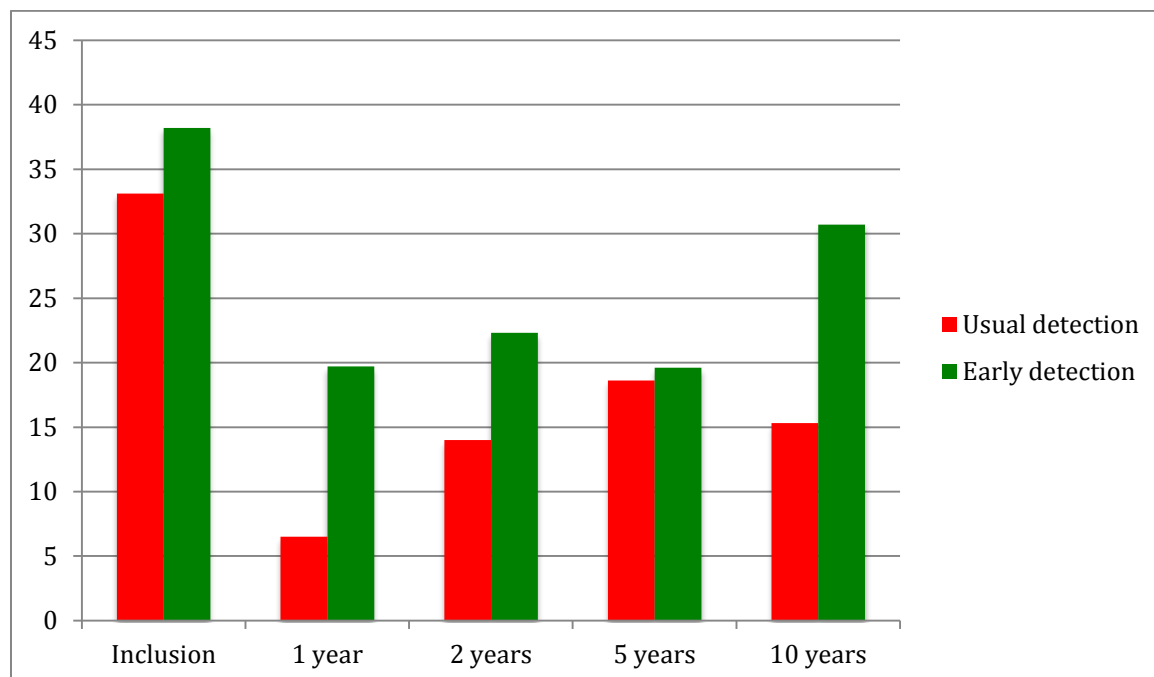

| <b>Years after inclusion</b> | <i>Usual detection</i> |             | <i>Early detection</i> |             | <i>Analysis</i> |                |
|------------------------------|------------------------|-------------|------------------------|-------------|-----------------|----------------|
|                              | <b>N (total N)</b>     | <b>%</b>    | <b>N (total N)</b>     | <b>%</b>    | <b>OR</b>       | <b>95% CI</b>  |
| <i>0 (N*=259)</i>            | <i>45 (136)</i>        | <i>33.1</i> | <i>47(123)</i>         | <i>38.2</i> | <i>1.3</i>      | <i>.8-2.1</i>  |
| <i>1 (N= 251)**</i>          | <i>8 (124)</i>         | <i>6.5</i>  | <i>25(127)</i>         | <i>19.7</i> | <i>3.6</i>      | <i>1.5-8.2</i> |
| <i>2 (N=235)</i>             | <i>16 (114)</i>        | <i>14</i>   | <i>27 (121)</i>        | <i>22.3</i> | <i>1.8</i>      | <i>.9-3.5</i>  |
| <i>5 (N= 188)</i>            | <i>16 (86)</i>         | <i>18.6</i> | <i>20 (102)</i>        | <i>19.6</i> | <i>1.1</i>      | <i>.5-2.2</i>  |
| <i>10 (N=173)#</i>           | <i>11 (72)</i>         | <i>15.3</i> | <i>31 (101)</i>        | <i>30.7</i> | <i>2.5</i>      | <i>1.1-5.3</i> |

\*N= number of complete data sets

\*\*p<.002

#p<.02

**Figure C; online supplement. Simple mediation model of negative symptoms as mediator between early detection and vocational outcome.**

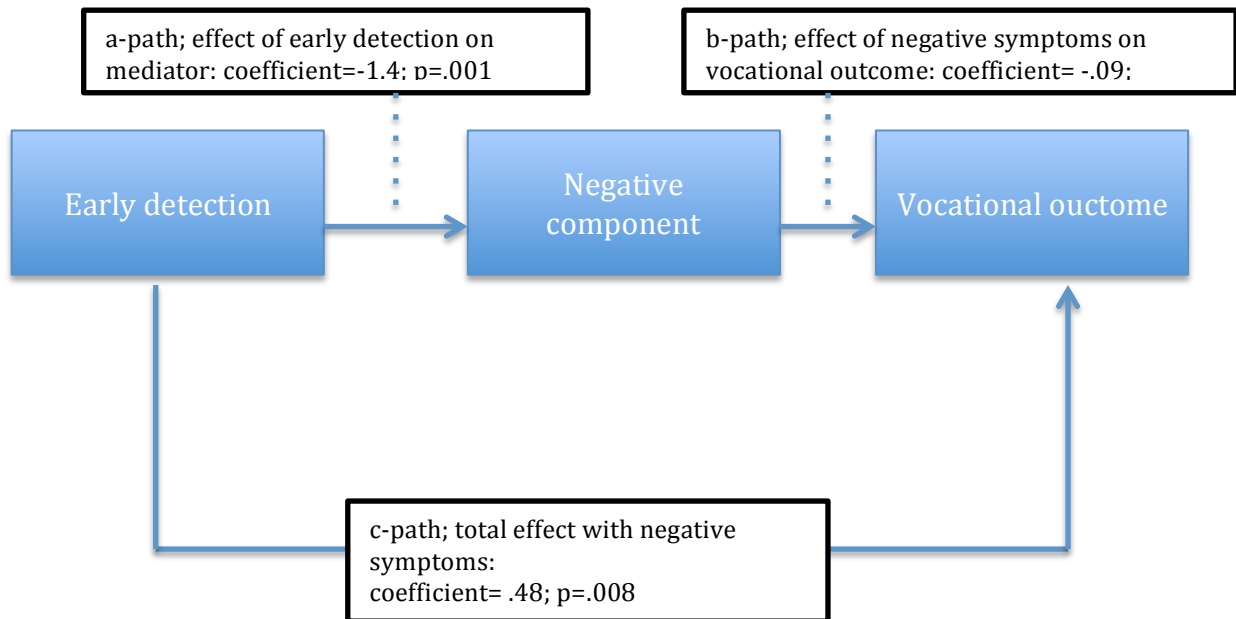

*Coefficient of indirect effect (ab path): .14. Bias corrected confidence interval for bootstrapped indirect effect: .07-.25.  
Nagelkerke's R2: .16*
